# Supplementary material
Source: PubMed Central journal article supplement (PMC3977597)

# Supplemental figure 1

**A**

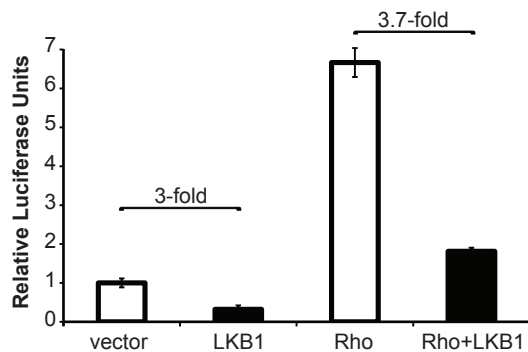

**Figure S.1:**

A) HeLa cells were transfected with a plasmid encoding constitutively active RhoA-Q63L mutant in combination with vector control or LKB1 expressing plasmid along with TEAD luciferase reporter constructs. TEAD dependent transcription was measured as described in figure 1c. Data representation of 2 independent experiments performed in triplicate.

B) Lysates from HeLa Vec and HeLa LKB1 cells were immunoblotted for Lats1, LKB1 and  $\beta$ -actin (left panel). The average levels of Lats1 protein from three independent experiments were also computed (right panel).

Error and significance are represented as described in figure 1.

**B**

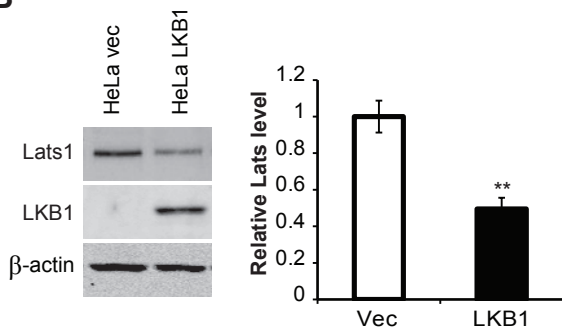

Supplement: NIHMS572973-supplement-supplement_1.pdf [file NIHMS572973-supplement-supplement_1.pdf]
